# Supplementary material
Source: publisher figshare collection journal article supplement (https://geolsoc.figshare.com/ndownloader/files/5421263)
Supplement: Supplementary file 1 [file 5421263]

analyses	rock type	texture	SiO2	TiO2	Al2O3	FeO	MnO	MgO	CaO	Na2O	Cr2O3	Total	Si	Ti	Al	Fe3+	Fe2+	Mn	Mg	Ca	Na	Cr	Total	Si+Al	AlIV	AlVI	Altotal	Wo	En	Fs	Mg#	Cr#
TM 22 5-38	harz	granoblatic	56.13	0.00	2.80	6.08	0.09	34.00	0.54	0.01	0.48	100.13	1.93	0.00	0.11	0.01	0.16	0.00	1.74	0.02	0.00	0.01	4.00	2.04	0.07	0.04	0.11	1.0	89.8	9.1	0.909	0.10
TM 22 5-40	harz	granoblatic	56.95	0.00	1.90	5.89	0.18	34.75	0.60	0.00	0.49	100.74	1.95	0.00	0.08	0.02	0.15	0.01	1.77	0.02	0.00	0.01	4.00	2.02	0.05	0.02	0.08	1.1	90.1	8.8	0.913	0.15
TM 22 5-44	harz	granoblatic	56.05	0.00	2.91	5.63	0.25	34.59	0.55	0.04	0.64	100.65	1.91	0.00	0.12	0.04	0.12	0.01	1.76	0.02	0.00	0.02	4.00	2.03	0.09	0.03	0.12	1.0	90.4	8.6	0.916	0.13
TM 22 23 B-5	harz	granoblatic	55.86	0.09	3.07	6.02	0.10	33.61	0.49	0.03	0.75	100.02	1.93	0.00	0.12	0.00	0.18	0.00	1.73	0.02	0.00	0.02	4.00	2.05	0.07	0.05	0.12	0.9	89.9	9.2	0.909	0.14
TM 22 23 B-6	harz	granoblatic	56.01	0.00	2.46	6.02	0.07	34.20	0.51	0.05	0.57	99.89	1.93	0.00	0.10	0.03	0.15	0.00	1.76	0.02	0.00	0.02	4.00	2.03	0.07	0.03	0.10	1.0	90.0	9.0	0.910	0.13
TM 22 23 B-7	harz	granoblatic	55.86	0.03	3.08	5.69	0.20	33.66	0.51	0.03	0.63	99.67	1.93	0.00	0.13	0.00	0.17	0.01	1.73	0.02	0.00	0.02	4.00	2.06	0.07	0.06	0.13	1.0	90.2	8.8	0.913	0.12
TM 22 23 B-8	harz	granoblatic	56.10	0.15	3.09	6.16	0.20	34.41	0.62	0.06	0.48	101.27	1.91	0.00	0.12	0.05	0.13	0.01	1.74	0.02	0.00	0.01	4.00	2.03	0.09	0.03	0.12	1.2	89.5	9.3	0.909	0.09
TM 22 23 B-9	harz	granoblatic	56.20	0.06	3.09	6.18	0.11	34.14	0.49	0.08	0.35	100.71	1.92	0.00	0.12	0.03	0.15	0.00	1.74	0.02	0.01	0.01	4.00	2.05	0.08	0.05	0.12	0.9	89.8	9.3	0.908	0.07
TM 22 25 A-58	lherz	granoblatic	56.23	0.00	3.13	5.70	0.12	33.89	0.47	0.03	0.48	100.05	1.93	0.00	0.13	-	0.17	0.00	1.74	0.02	0.00	0.01	4.00	2.06	0.07	0.06	0.13	0.9	90.4	8.7	0.914	0.09
TM 22 25 A-59	lherz	granoblatic	56.30	0.02	2.83	5.53	0.00	34.03	0.53	0.04	0.57	99.84	1.94	0.00	0.12	-	0.17	0.00	1.75	0.02	0.00	0.02	4.00	2.05	0.06	0.05	0.12	1.0	90.7	8.3	0.917	0.12
TM 22 25 A-61	lherz	granoblatic	56.48	0.00	2.55	5.33	0.15	34.47	0.48	0.03	0.51	100.00	1.94	0.00	0.10	0.00	0.15	0.00	1.77	0.02	0.00	0.01	4.00	2.04	0.06	0.04	0.10	0.9	91.0	8.1	0.920	0.12
TM 22 25 A-71	lherz	granoblatic	56.68	0.00	2.60	5.61	0.08	34.36	0.62	0.02	0.50	100.46	1.94	0.00	0.10	0.00	0.16	0.00	1.75	0.02	0.00	0.01	4.00	2.05	0.06	0.05	0.10	1.2	90.4	8.4	0.916	0.11
TM 22 25 A-75	lherz	granoblatic	56.22	0.03	2.56	6.08	0.12	34.52	0.62	0.04	0.30	100.49	1.92	0.00	0.10	0.04	0.13	0.00	1.76	0.02	0.00	0.01	4.00	2.03	0.08	0.03	0.10	1.2	89.8	9.0	0.910	0.07
TM 22 25 A-58	lherz	granoblatic	56.23	0.00	3.13	5.70	0.12	33.89	0.47	0.03	0.48	100.05	1.93	0.00	0.13	-	0.17	0.00	1.74	0.02	0.00	0.01	4.00	2.06	0.07	0.06	0.13	0.9	90.4	8.7	0.914	0.09
TM 22 25 A-59	lherz	granoblatic	56.30	0.02	2.83	5.53	0.00	34.03	0.53	0.04	0.57	99.84	1.94	0.00	0.12	-	0.17	0.00	1.75	0.02	0.00	0.02	4.00	2.05	0.06	0.05	0.12	1.0	90.7	8.3	0.917	0.12
TM 22 25 A-61	lherz	granoblatic	56.48	0.00	2.55	5.33	0.15	34.47	0.48	0.03	0.51	100.00	1.94	0.00	0.10	0.00	0.15	0.00	1.77	0.02	0.00	0.01	4.00	2.04	0.06	0.04	0.10	0.9	91.0	8.1	0.920	0.12
TM 22 25 A-71	lherz	granoblatic	56.68	0.00	2.60	5.61	0.08	34.36	0.62	0.02	0.50	100.46	1.94	0.00	0.10	0.00	0.16	0.00	1.75	0.02	0.00	0.01	4.00	2.05	0.06	0.05	0.10	1.2	90.4	8.4	0.916	0.11
TM 22 25 A-75	lherz	granoblatic	56.22	0.03	2.56	6.08	0.12	34.52	0.62	0.04	0.30	100.49	1.92	0.00	0.10	0.04	0.13	0.00	1.76	0.02	0.00	0.01	4.00	2.03	0.08	0.03	0.10	1.2	89.8	9.0	0.910	0.07
TM 22 26 B-16	harz	granoblatic	56.62	0.01	2.39	5.57	0.25	34.37	0.52	0.02	0.51	100.26	1.94	0.00	0.10	0.00	0.16	0.01	1.76	0.02	0.00	0.01	4.00	2.04	0.06	0.04	0.10	1.0	90.4	8.6	0.917	0.13
TM 22 26 B-17	harz	granoblatic	56.86	0.06	1.67	5.72	0.24	34.68	0.42	0.01	0.31	99.98	1.96	0.00	0.07	0.01	0.15	0.01	1.78	0.02	0.00	0.01	4.00	2.02	0.04	0.02	0.07	0.8	90.5	8.7	0.915	0.11
TM 22 26 B-18	harz	granoblatic	56.31	0.00	2.92	5.95	0.19	34.78	0.51	0.05	0.54	101.25	1.91	0.00	0.12	0.05	0.12	0.01	1.76	0.02	0.00	0.01	4.00	2.03	0.09	0.03	0.12	0.9	90.1	8.9	0.912	0.11
TM 22 26 B-19	harz	granoblatic	56.71	0.05	2.82	5.49	0.12	34.24	0.59	0.01	0.63	100.69	1.94	0.00	0.11	-	0.17	0.00	1.75	0.02	0.00	0.02	4.00	2.05	0.06	0.05	0.11	1.1	90.5	8.3	0.917	0.13
TM 22 26 B-20	harz	granoblatic	56.71	0.01	2.38	5.76	0.16	34.72	0.54	0.02	0.76	101.07	1.93	0.00	0.10	0.02	0.14	0.00	1.76	0.02	0.00	0.02	4.00	2.03	0.07	0.03	0.10	1.0	90.3	8.6	0.915	0.18
TM 22 27A-53	harz	granoblatic	57.45	0.01	1.16	5.82	0.18	35.16	0.49	0.05	0.34	100.64	1.96	0.00	0.05	0.02	0.14	0.01	1.79	0.02	0.00	0.01	4.00	2.01	0.04	0.01	0.05	0.9	90.4	8.7	0.915	0.16
TM 22 27A-56	harz	granoblatic	57.45	0.00	1.42	5.92	0.22	34.65	0.39	0.02	0.45	100.52	1.97	0.00	0.06	-	0.18	0.01	1.77	0.01	0.00	0.01	4.00	2.03	0.03	0.03	0.06	0.7	90.3	9.0	0.913	0.18
TM 22 28 B-120	harz	porphyroclastic	56.31	0.00	2.65	6.65	0.22	34.40	0.53	0.08	0.51	101.34	1.92	0.00	0.11	0.05	0.13	0.01	1.74	0.02	0.01	0.01	4.00	2.02	0.08	0.02	0.11	1.0	89.0	10.0	0.902	0.11
TM 22 28 B-121	harz	porphyroclastic	56.22	0.08	2.74	5.93	0.13	33.72	0.55	0.03	0.62	100.03	1.94	0.00	0.11	-	0.18	0.00	1.73	0.02	0.00	0.02	4.00	2.05	0.06	0.05	0.11	1.1	89.9	9.1	0.910	0.13
TM 22 28 B-122	harz	porphyroclastic	56.85	0.00	2.10	6.08	0.13	34.92	0.44	0.02	0.36	100.90	1.94	0.00	0.08	0.03	0.14	0.00	1.77	0.02	0.00	0.01	4.00	2.02	0.06	0.02	0.08	0.8	90.2	9.0	0.911	0.10
TM 22 28 B-123	harz	porphyroclastic	56.45	0.00	2.35	6.11	0.15	34.12	0.58	0.04	0.45	100.25	1.94	0.00	0.10	0.02	0.16	0.00	1.75	0.02	0.00	0.01	4.00	2.04	0.06	0.04	0.10	1.1	89.7	9.2	0.909	0.11
TM 22 28 B-128	harz	porphyroclastic	56.63	0.10	2.57	6.20	0.02	33.80	0.47	0.05	0.46	100.30	1.95	0.00	0.10	-	0.19	0.00	1.73	0.02	0.00	0.01	4.00	2.05	0.05	0.05	0.10	0.9	89.8	9.3	0.907	0.11
TM 22 28 B-129	harz	porphyroclastic	57.08	0.04	1.82	6.10	0.16	34.61	0.46	0.06	0.33	100.65	1.95	0.00	0.07	0.01	0.16	0.00	1.76	0.02	0.00	0.01	4.00	2.03	0.05	0.03	0.07	0.9	90.0	9.1	0.910	0.11
TM 22 28 B-131	harz	porphyroclastic	56.19	0.07	2.38	6.49	0.22	33.96	0.57	0.03	0.38	100.30	1.93	0.00	0.10	0.03	0.16	0.01	1.74	0.02	0.00	0.01	4.00	2.03	0.07	0.03	0.10	1.1	89.0	9.9	0.903	0.10
TM 22 6-135	lherz	mylonitic	56.45	0.00	2.75	6.07	0.09	34.12	0.34	0.00	0.57	100.39	1.94	0.00	0.11	0.00	0.18	0.00	1.75	0.01	0.00	0.02	4.00	2.05	0.06	0.05	0.11	0.6	90.2	9.1	0.909	0.12
TM 22 6-141	lherz	mylonitic	56.97	0.06	1.87	6.50	0.17	34.81	0.19	0.04	0.29	100.90	1.94	0.00	0.08	0.03	0.16	0.00	1.77	0.01	0.00	0.01	4.00	2.02	0.06	0.02	0.08	0.4	90.0	9.7	0.905	0.09
TM 22 6A-26	harz	mylonitic	56.08	0.00	2.69	5.95	0.20	34.40	0.24	0.01	0.80	100.36	1.92	0.00	0.11	0.02	0.15	0.01	1.76	0.01	0.00	0.02	4.00	2.03	0.08	0.03	0.11	0.4	90.5	9.1	0.912	0.17
TM 22 6A-31	harz	mylonitic	56.17	0.00	2.81	5.41	0.12	34.40	0.11	0.00	0.72	99.73	1.94	0.00	0.11	-	0.16	0.00	1.77	0.00	0.00	0.02	4.00	2.05	0.06	0.05	0.11	0.2	91.5	8.3	0.919	0.15
TM 22 6A-32	harz	mylonitic	56.39	0.01	2.22	6.06	0.06	34.71	0.26	0.02	0.55	100.28	1.93	0.00	0.09	0.03	0.15	0.00	1.77	0.01	0.00	0.01	4.00	2.02	0.07	0.02	0.09	0.5	90.6	9.0	0.911	0.14
TM 22 9-94	lherz	mylonitic	56.60	0.04	2.21	6.22	0.24	34.18	0.44	0.03	0.31	100.26	1.95	0.00	0.09	0.01	0.17	0.01	1.75	0.02	0.00	0.01	4.00	2.04	0.05	0.04	0.09	0.8	89.7	9.5	0.907	0.09
TM 22 9-95	lherz	mylonitic	56.45	0.00	2.53	6.15	0.05	34.69	0.45	0.01	0.37	100.70	1.93	0.00	0.10	0.03	0.14	0.00	1.77	0.02	0.00	0.01	4.00	2.03	0.07	0.03	0.10	0.8	90.1	9.0	0.910	0.09
TM 22 9-96	lherz	mylonitic	56.08	0.00	2.93	6.42	0.21	34.32	0.83	0.03	0.55	101.37	1.91	0.00	0.12	0.06	0.13	0.01	1.74	0.03	0.00	0.01	4.00	2.02	0.09	0.02	0.12	1.5	88.8	9.6	0.905	0.11
TM 22 9-101	lherz	mylonitic	56.29	0.00	2.90	6.20	0.13	33.96	0.29	0.00	0.55	100.33	1.93	0.00	0.12	0.00	0.18	0.00	1.74	0.01	0.00	0.01	4.00	2.05	0.07	0.05	0.12	0.5	90.0	9.4	0.907	0.11
TM 22 9-103	lherz	mylonitic	56.89	0.00	2.17	5.88	0.15	34.46	0.41	0.06	0.18	100.20	1.95	0.00	0.09	0.01	0.16	0.00	1.76	0.02	0.00	0.00	4.00	2.04	0.05	0.04	0.09	0.8	90.4	8.9	0.913	0.05
TM 22 7-78	pyroxenite	adcumulate	51.91	0.31	5.37	14.36	0.21	27.26	0.68	0.03	0.05	100.16	1.85	0.01	0.23	0.05	0.37	0.01	1.45	0.03	0.00	0.00	4.00	2.08	0.15	0.08	0.23	1.4	75.9	22.8	0.77	0.01
TM 22 7-90	pyroxenite	adcumulate	52.25	0.16	5.21	14.01	0.34	27.25	0.74	0.08	0.12	100.17	1.86	0.00	0.22	0.05	0.37	0.01	1.45	0.03	0.01	0.00	4.00	2.08	0.14	0.08	0.22	1.5	76.0	22.5	0.78	0.02
